# Supplementary material
Source: publisher figshare collection journal article supplement (https://tandf.figshare.com/ndownloader/files/21837921)
Supplement: Supplementary file 1 [file 21837921]

**Appendix 1. References for Table 1**

Ba, J.W., Chen, D.Q., 2012. Invasive fishes in Three Gorges Reservoir area and preliminary study on effects of fish invasion owing to impoundment. J. Lake Sci. 24(2), 185–189.

Chen, C.H., 2004. Checklist of the fishes of Penghu. FRI Special Publication No. 4.

Chen, J.Z., Shen, G.M., Meng, S.L., Qu, J.H., 2010. Investigation and study on the aquaculture alien species in the lower reaches of Yangtze River. Chi. Agr. Sci. Bull. 26(3), 315–319.

Chen, S.G., Song, Y., Wang, S.I., Yang, B., Tang, L., Ren, D.Q., 2015. Age and growth of *Ictalurus nebulosus* about Shengli Reservoir in Tarim River Basin. J. Tarim Univ. 27(3), 14-18.

Chen, S.Z., 1994. The study on the introduced fishes and their productive benefits. Mod. Fish. Inform. 9(3), 5–9.

Chen, X.N., Guo Y.J., Wu, G.H., 2010. Fish fauna and characteristic of Xinghu Lake in Guangdong. J. Hydroeco. 3(1), 29–33.

Chen, Y.X., Huang, S.B., Liu, J.Q., 2010. *Invasive Freshwater Fishes in Taiwan*. National Taiwan Ocean University, Keelung City.

Deng, F.Y., Zhang, C.G., Zhao, Y.H., Zhou, Q.H., Zhang, J., 2013. Diversity and community structure of the fishes in the headstream region of the Dongjiang River. Chin. J. Zool. 48(2), 161–173.

Hao, F.H., Chen, Y.F., Cai B., 2006. Embryonic development of Salmo trutta fario from Yadong River, Tibet. J. Fish. China 30(3), 289–296.

He, S.F., 2007. An initial investigation report on the freshwater fish resource in the Huotong River in East Fujian. J. Ningde Teach. Coll. 19(2), 127–130.

Kottelat, M., 2013. The fishes of the inland waters of Southeast Asia: a catalogue and core bibliography of the fishes known to occur in freshwaters, mangroves and estuaries. Raffles B. Zool. (Suppl. 27), 1-663.

Kuo, S.R., Shao K.T., 1999. Species composition of fish in the coastal zones of the Tsengwen estuary, with descriptions of five new records from Taiwan. Zool. Stud. 38(4), 391-404.

Li, J.L., Dong, Z.G., Li, Y.S., Wang, C.H., 2007. *Alien aquatic plants and animals in China*. Shanghai Scientific and Technical Publishers, Shanghai.

Liang, S.H., Chuang L.C., Chang M.H., 2006. The pet trade as a source of invasive fish in Taiwan. Taiwania 51(2), 93–98.

Liang, Y.B., Wang, B., 2001. Alien marine species and their impacts in China. Biodivers. Sci.; 9(4), 458-465.

Page, L.M., Robins, R.H., 2006. Identification of sailfin catfishes (Teleostei: Loricariidae) in Southeastern Asia. Raffles Bull. Zool. 54(2), 455-457.

Radhakrishnan, K.V., Lan, Z.J., Zhao, J., Ning, Q., Huang, X.L., 2011. Invasion of the African sharp-tooth catfish *Clarias gariepinus* (Burchell, 1822) in South China. Biol. Invasions. 13(8), 1723-1727.

Ren, M.L., Guo, Y., Zhang, R.M., Cai, L.G., Adak, Li, H., Fu, Y.L., Liu, K.L., 2002. Fishes and fish fauna composition in Ergis River China. Arid Zone Res. 19(2), 62–66.

Tang, W.J., Chen, Y.F., Ding, C.Z., 2013. The current situation and protection of fish resources in Huangshui River in Qinghai Province. J. Dalian Ocean Univ. 28(3), 307–313.

Tang, W.J., He, D.K., 2013. Fish resource survey on Cihaxia to Jishixia stretches in the upper reaches of Yellow River, (2005–2010). J. Lake Sci. 25(4), 600–608.

Wang, D.Z., 1995. The changes of fishes fauna and protections of aboriginal fishes in the Tarim River. Arid Zone Res. 12(3), 54–59.

Wang, J., Shi, H.T., Ma, K., Li, C., 2012. An invasive fish *Parachromis managuensis* found in Wanquan River, Hainan, China. Chin. J. Zool. 47(5), 124–126.

Xu, H.G., Qiang S., 2018. *China’s Invasive Alien Species (Revised Edition)*. Science Press, Beijing.

Yu, D.Z., Li, R.H., Chu, S.H., Wan, P., Chang, X.Q., Wu, H.H., Huang, M.S., 2011. Invasive species in Hubei province of China and its relationship with the social and economic activities. J. Biosaf. 20(1), 56–63.

Yu, D.Z., Li, R.H., Chu, S.H., Wan, P., Chang, X.Q., Wu, H.H., Huang, M.S., 2011. Invasive species in Hubei province of China and its relationship with the social and economic activities. J. Biosaf. 20(1), 56–63.

Yu, F.D., Wang, D.Q., Gu, D.E., Hu, Y.C., Zhu, H., Tong, Y.N., Li, F.Y., Shen, Z.X., 2018. Species composition and distributional status of fishes in Nandujiang River, Hainan Island, China. Freshw.r Fish. 48(2), 58-67.

Yuan, L.Y., Zhou, Z.C., Zhou, J.J., Fang, Y.F., Yang, J., 2012. Preliminary investigation of fish resources in the Tongshan River. Sichuan J. Zool. 31(6), 961–964.

Zhu, Y., Lan, J., 2012. Preliminary investigation of aquatic organisms in Lake Nan. Fish. Sci. Technol. Guangxi (4), 2–7.
